# Supplementary material for: Investigating the Relation between Visitor Attention and Visual Quality of Forest Landscape: A Mobile EEG Study
Source: MDPI journal article supplement (doi:10.3390/f13101668), 2022-10-11
Supplement: s1 [file s1]

Archive with 1 entries (1 files):
- forests-1928151-supplementary.pdf
